# Supplementary material for: Are Forensic Experts Already Biased before Adversarial Legal Parties Hire Them?
Source: PLOS journal article supplement (doi:10.1371/journal.pone.0154434), 2016-04-28
Supplement: S1 (10.1371/journal.pone.0154434.s001) [file journal.pone.0154434.s001]

### S1 File. Forensic Psychologist Questionnaire

1. What is the highest degree you have earned?  
 Ph.D.                       J.D.                       Joint Ph.D./J.D.  
 Psy.D.                       Master's Degree       Other (Specify \_\_\_\_\_)
  
2. What is your primary place of employment?
  - a.  Institution or agency (e.g., hospital, prison, court clinic, etc.)
    - i. Specify type of institution \_\_\_\_\_
  - b.  Private
    - i. Specify type of practice \_\_\_\_\_
  - c.  University
  - d.  Other or more than one  
(specify \_\_\_\_\_)
  
3. Do you conduct forensic evaluations?       Yes       No
  
4. If so, for how many years have you conducted forensic evaluations? \_\_\_\_\_
  
5. Are you certified by a specialty board in forensic or clinical psychology?  Yes  No
  - a. If yes, specify \_\_\_\_\_
  
6. What is the primary state in which you practice? \_\_\_\_\_
  
7. Are you licensed to practice in other states?  Yes       No
  - a. If so, in what other states are you licensed to practice?  
\_\_\_\_\_  
\_\_\_\_\_
  
8. Do any of the states in which you practice have the death penalty?  Yes  No
  - a. If so, which state(s)? \_\_\_\_\_
  
9. If you practice in a death penalty state, do you perform capital case evaluations?  Yes  No
  
10. If a state in which you practice has the death penalty, have you or would you evaluate a defendant in a capital case for the prosecution?       Yes  No
  
11. If the state in which you practice has the death penalty, have you or would you evaluate a defendant in a capital case for the defense?       Yes  No

12. If applicable, have you or would you evaluate a defendant in a capital case for the court as a court appointed assessor?  Yes  No

13. What is your gender?  Male  Female

14. What is your age? \_\_\_\_\_

15. What do you consider to be your race or ethnicity?

- |                                           |                                               |                                                |
|-------------------------------------------|-----------------------------------------------|------------------------------------------------|
| <input type="checkbox"/> African American | <input type="checkbox"/> Hispanic (non-white) | <input type="checkbox"/> Pacific Islander      |
| <input type="checkbox"/> Asian            | <input type="checkbox"/> Hispanic (white)     | <input type="checkbox"/> White                 |
| <input type="checkbox"/> Biracial         | <input type="checkbox"/> Native American      | <input type="checkbox"/> Other (Specify _____) |
